# Supplementary material for: Physicochemical Effects of Lactobacillus plantarum and Lactobacillus casei Cocultures on Soy–Wheat Flour Dough Fermentation
Source: PubMed Central journal article supplement (PMC7766497; doi:10.3390/foods9121894), 2020-12-18
Supplement: foods-09-01894-s001.pdf [file foods-09-01894-s001.pdf]

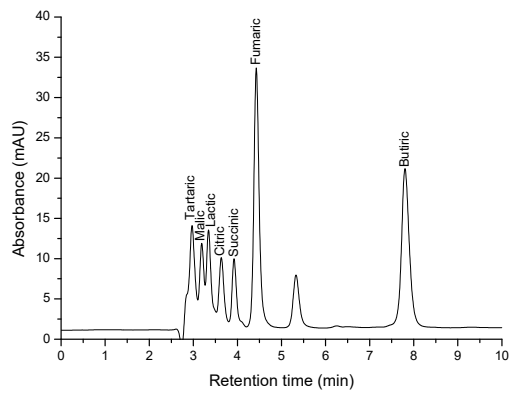

| Retention time (min) | Organic acid |
|----------------------|--------------|
| 2.97                 | Tartaric     |
| 3.18                 | Malic        |
| 3.34                 | Lactic       |
| 3.65                 | Citric       |
| 3.97                 | Succinic     |
| 4.42                 | Fumaric      |
| 7.80                 | Butyric      |

**Supplementary Figure 1.** HPLC chromatogram of organic acids standards and retention times.

**Supplementary Table S1.** Cell viability and pH profile of the fermentations at the three different substrate concentrations (wheat and soy-flour) and MM for 24 h with the co-cultures

|                | <b>Time (h)</b>  | <b>0</b>    | <b>4</b>    | <b>8</b>    | <b>12</b>    | <b>24</b>    |
|----------------|------------------|-------------|-------------|-------------|--------------|--------------|
| <b>MM</b>      | <b>pH</b>        | 6.12 ± 0.07 | 5.95 ± 0.08 | 5.40 ± 0.11 | 5.13 ± 0.07  | 4.06 ± 0.08  |
|                | <b>viability</b> | 7.40 ± 0.33 | 8.01 ± 0.27 | 9.30 ± 0.24 | 10.39 ± 0.31 | 11.51 ± 0.47 |
| <b>Batch A</b> | <b>pH</b>        | 6.24 ± 0.03 | 5.97 ± 0.05 | 5.66 ± 0.14 | 5.11 ± 0.02  | 4.14 ± 0.03  |
|                | <b>viability</b> | 6.20 ± 0.26 | 7.01 ± 0.31 | 8.30 ± 0.35 | 8.34 ± 0.28  | 10.77 ± 0.45 |
| <b>Batch B</b> | <b>pH</b>        | 6.24 ± 0.06 | 5.91 ± 0.11 | 5.74 ± 0.05 | 5.41 ± 0.09  | 4.23 ± 0.04  |
|                | <b>viability</b> | 6.11 ± 0.13 | 6.42 ± 0.35 | 7.98 ± 0.26 | 8.50 ± 0.21  | 10.99 ± 0.37 |
| <b>Batch C</b> | <b>pH</b>        | 6.25 ± 0.07 | 5.82 ± 0.14 | 5.41 ± 0.14 | 5.07 ± 0.11  | 4.22 ± 0.07  |
|                | <b>viability</b> | 6.42 ± 0.19 | 6.87 ± 0.23 | 8.08 ± 0.28 | 8.46 ± 0.24  | 10.28 ± 0.41 |

Results (displayed as mean values ±SD, n = 3), MM – model media; batch A - 90% WF enriched with 10% SF; batch B - 95% WF enriched with 5% SF; batch C - 100% WF.

**Supplementary Table S2.** Standard deviation of storage ( $G'$ ) and loss ( $G''$ ) shear moduli for 100% wheat flour with *LP + LC* co-cultures.

| [rad/s]      | SM.0         | LM.0         | SM.4         | LM.4         | SM.10        | LM.10        | SM.24        | LM.24         |
|--------------|--------------|--------------|--------------|--------------|--------------|--------------|--------------|---------------|
| <b>0.943</b> | 455.73 ± 3.6 | 334.53 ± 4.6 | 439.19 ± 5.1 | 338.41 ± 3.3 | 572.67 ± 4.8 | 383.66 ± 5.1 | 381.33 ± 8.5 | 275.23 ± 4.1  |
| <b>1.73</b>  | 481.85 ± 11  | 329.28 ± 7.2 | 426.23 ± 8.5 | 321.23 ± 5   | 606.1 ± 8.6  | 386.07 ± 4.4 | 450.05 ± 11  | 337.92 ± 4.6  |
| <b>2.13</b>  | 484.07 ± 9.7 | 336.42 ± 5.6 | 466.37 ± 7.1 | 321.78 ± 2.8 | 630.62 ± 2.9 | 390.29 ± 1.7 | 461.89 ± 5.6 | 338.05 ± 3.9  |
| <b>3.91</b>  | 497.02 ± 12  | 339.03 ± 4.3 | 467.86 ± 2.1 | 308.7 ± 9    | 649.06 ± 8.5 | 394.74 ± 3.9 | 484.22 ± 6.8 | 365.68 ± 6.8  |
| <b>7.19</b>  | 521.71 ± 8.5 | 355.06 ± 8.4 | 510.92 ± 6.2 | 318.09 ± 1.8 | 710.96 ± 4.2 | 412.32 ± 2.8 | 509.26 ± 9.1 | 394.28 ± 5.5  |
| <b>13.2</b>  | 546.24 ± 7.2 | 362.44 ± 6.6 | 522.44 ± 9.5 | 343.23 ± 8.5 | 743.5 ± 1.1  | 426.47 ± 7.5 | 523.24 ± 6.4 | 442.01 ± 10   |
| <b>24.3</b>  | 564.6 ± 10.1 | 394.06 ± 5.8 | 568.28 ± 11  | 374.83 ± 3.3 | 769.93 ± 9.7 | 471.37 ± 11  | 555.6 ± 5.7  | 435.52 ± 11.1 |
| <b>54.8</b>  | 571.57 ± 9.3 | 411.75 ± 9.1 | 566.03 ± 5.6 | 381.5 ± 6.8  | 822.22 ± 6.1 | 496.83 ± 2.3 | 585.65 ± 3.8 | 461.33 ± 8.9  |
| <b>67.2</b>  | 623.09 ± 8.8 | 444.03 ± 11  | 582.56 ± 7.1 | 395.84 ± 2.3 | 868.43 ± 11  | 532.36 ± 5.2 | 594.5 ± 4.1  | 490.58 ± 7.1  |
| <b>82.3</b>  | 653.68 ± 10  | 476.94 ± 7.3 | 600.05 ± 5.2 | 401.28 ± 4.3 | 928.59 ± 8.5 | 577.68 ± 7.1 | 608.17 ± 5.8 | 538.53 ± 4.9  |
| <b>101</b>   | 687.55 ± 9.4 | 510.23 ± 7.7 | 592.38 ± 9.8 | 410.34 ± 5.2 | 973.16 ± 9.9 | 613.36 ± 9   | 691.85 ± 6.7 | 564.81 ± 6.1  |
| <b>124</b>   | 701.91 ± 5.5 | 534.07 ± 6.8 | 624.91 ± 5.4 | 434.38 ± 9.5 | 1021.4 ± 3.6 | 678.67 ± 7.6 | 761.18 ± 3.5 | 601.12 ± 10   |
| <b>151</b>   | 702.76 ± 6.4 | 556.42 ± 6.4 | 651.26 ± 6.3 | 462.61 ± 5.8 | 1121.8 ± 1.9 | 729 ± 11.3   | 846.64 ± 2.2 | 644.9 ± 13.4  |
| <b>186</b>   | 713.51 ± 7.1 | 586.63 ± 7.1 | 674.34 ± 8.3 | 502.17 ± 8   | 1256 ± 4.1   | 797.55 ± 3.4 | 959.31 ± 3.8 | 697.17 ± 5.6  |
| <b>227</b>   | 747.71 ± 12  | 613.76 ± 8.2 | 695.19 ± 9   | 551.57 ± 5.2 | 1435.6 ± 9.5 | 869.51 ± 6.7 | 1041.9 ± 4.9 | 725.08 ± 2.8  |
| <b>279</b>   | 777.95 ± 9.9 | 634.3 ± 4.1  | 750.98 ± 1.2 | 599.03 ± 5.6 | 1715.8 ± 6.7 | 958.14 ± 5.5 | 1130.6 ± 6.7 | 742.41 ± 8.9  |
| <b>341</b>   | 778.08 ± 14  | 665.96 ± 12  | 773.98 ± 4.1 | 620.61 ± 8.9 | 1924.1 ± 7.4 | 992.64 ± 2.4 | 1214.5 ± 3.2 | 771.98 ± 1.9  |
| <b>418</b>   | 802.52 ± 8.7 | 679.9 ± 9.1  | 781.95 ± 5.7 | 648.57 ± 4.4 | 2557.7 ± 1.2 | 1089.9 ± 1.7 | 1332.4 ± 12  | 774.44 ± 5.1  |
| <b>513</b>   | 811.12 ± 3.4 | 711.34 ± 1.7 | 779.87 ± 8.1 | 678.89 ± 3.2 | 3259.6 ± 8.9 | 1178.1 ± 6.7 | 1696.3 ± 7.8 | 843.59 ± 6.8  |
| <b>628</b>   | 816.62 ± 11  | 742.19 ± 5.9 | 790 ± 12.2   | 709.63 ± 11  | 3578.6 ± 7.1 | 1398.6 ± 8.2 | 1743.4 ± 9.3 | 1102.4 ± 7.1  |

Results (displayed as mean values ±SD, n = 3), SM – storage modulus, LM – loss modulus.

**Supplementary Table S3.** Standard deviation of storage ( $G'$ ) and loss ( $G''$ ) shear moduli for 95% wheat flour and 5% soy flour with  $LP + LC$  co-cultures.

| [rad/s]      | SM.0          | LM.0          | SM.4         | LM.4         | SM.10        | LM.10         | SM.24        | LM.24        |
|--------------|---------------|---------------|--------------|--------------|--------------|---------------|--------------|--------------|
| <b>0.943</b> | 1957.3 ± 9.9  | 821.35 ± 7.4  | 2014.2 ± 7.1 | 695.37 ± 8.1 | 1723.4 ± 3.5 | 645.69 ± 1.9  | 1126.5 ± 5.6 | 544.71 ± 13  |
| <b>1.73</b>  | 2281 ± 8.3    | 841.82 ± 5.9  | 2120.8 ± 1.4 | 711.04 ± 4.6 | 1850.9 ± 8.2 | 650.08 ± 5.7  | 1227.3 ± 7.7 | 551.26 ± 5.6 |
| <b>2.13</b>  | 2473.5 ± 7.4  | 899.06 ± 6.1  | 2213.9 ± 5.6 | 708.14 ± 3.1 | 1956.4 ± 2.6 | 648.03 ± 12.1 | 1319.8 ± 8.7 | 572.62 ± 3.7 |
| <b>3.91</b>  | 2634.6 ± 11   | 944.89 ± 3.7  | 2278.7 ± 3.6 | 714.92 ± 9.4 | 2028.4 ± 4.7 | 696.45 ± 6.7  | 1413.6 ± 9.8 | 599.3 ± 6.8  |
| <b>7.19</b>  | 2731.9 ± 5.6  | 996.57 ± 9.4  | 2394.5 ± 5.2 | 717.2 ± 11.6 | 2123.2 ± 5.6 | 740.62 ± 8.1  | 1476.5 ± 14  | 619.64 ± 9.9 |
| <b>13.2</b>  | 2777.3 ± 4.3  | 1006.7 ± 7.5  | 2418.4 ± 5   | 746.26 ± 7.9 | 2217.2 ± 3.7 | 756.42 ± 9.8  | 1575.2 ± 5.6 | 636.56 ± 3.8 |
| <b>24.3</b>  | 2859.4 ± 8.1  | 1016.1 ± 4.4  | 2507.1 ± 7.5 | 758.98 ± 6.8 | 2332.6 ± 5.5 | 807.5 ± 2.8   | 1650.5 ± 6.7 | 666.52 ± 3.7 |
| <b>54.8</b>  | 2979 ± 7.9    | 1059.8 ± 9.2  | 2550 ± 7.2   | 773.56 ± 4.7 | 2462.8 ± 10  | 844.23 ± 4.4  | 1745.3 ± 7.4 | 692.26 ± 1.9 |
| <b>67.2</b>  | 3106.8 ± 10   | 1068.9 ± 2.5  | 2653.1 ± 1.9 | 850 ± 12.3   | 2587 ± 9.1   | 892.4 ± 5.6   | 1791.2 ± 6.3 | 707.73 ± 3.6 |
| <b>82.3</b>  | 3247.2 ± 1.3  | 1121.8 ± 5.1  | 2779.1 ± 5.1 | 879.54 ± 8.7 | 2725.6 ± 6.7 | 943.08 ± 7.4  | 1839.3 ± 3.7 | 733.24 ± 7.1 |
| <b>101</b>   | 3397.9 ± 5.6  | 1181.2 ± 7.9  | 2914 ± 4.1   | 932.66 ± 3.9 | 2848.7 ± 1.9 | 1005.1 ± 6.5  | 1941.9 ± 6.6 | 773.45 ± 6.5 |
| <b>124</b>   | 3602.4 ± 6.8  | 1272.9 ± 4.2  | 3056.6 ± 4.2 | 999.38 ± 9.1 | 2974.1 ± 2.6 | 1102.6 ± 3.7  | 2016.8 ± 9   | 832.18 ± 5.1 |
| <b>151</b>   | 3847.3 ± 7.8  | 1372.3 ± 7.5  | 3206.8 ± 8.8 | 1078.2 ± 5.3 | 3164.2 ± 7.4 | 1190.8 ± 4.1  | 2141.2 ± 7.2 | 901.74 ± 3.7 |
| <b>186</b>   | 3962.3 ± 5.5  | 1426.4 ± 2.7  | 3338 ± 2.7   | 1172.7 ± 5.9 | 3249.7 ± 8.7 | 1241.2 ± 3.7  | 2305.5 ± 5.9 | 985.19 ± 8.1 |
| <b>227</b>   | 4103 ± 7.8    | 1496.1 ± 8.7  | 3493.9 ± 8.4 | 1284 ± 6.7   | 3337.1 ± 3.6 | 1297.5 ± 7.8  | 2482.7 ± 6.4 | 1073.3 ± 1.9 |
| <b>279</b>   | 4288.7 ± 8.4  | 1563.9 ± 1.2  | 3632.9 ± 3.8 | 1398 ± 8.8   | 3551.8 ± 6.4 | 1418.8 ± 2.4  | 2752.2 ± 3.4 | 1187.2 ± 3.3 |
| <b>341</b>   | 4508.7 ± 4.1  | 1640.1 ± 11   | 3663.9 ± 2.4 | 1537 ± 5.9   | 3671.2 ± 5.2 | 1486 ± 9.7    | 3136.4 ± 5.2 | 1308.4 ± 7.6 |
| <b>418</b>   | 5033.9 ± 8.7  | 1779.9 ± 10.3 | 3749.1 ± 3.9 | 1692.4 ± 6   | 3814.4 ± 5.4 | 1540 ± 3.4    | 3372.3 ± 6.2 | 1353.6 ± 8.4 |
| <b>513</b>   | 5483.4 ± 8.5  | 1953.3 ± 8.6  | 3898.6 ± 2.5 | 1840 ± 5.7   | 3944.4 ± 2.2 | 1603.9 ± 6.6  | 3830.8 ± 9.7 | 1503.9 ± 2.4 |
| <b>628</b>   | 5509.4 ± 11.1 | 1905.9 ± 3.6  | 4017.4 ± 6.7 | 2121 ± 8.9   | 4079.7 ± 3.7 | 1792.4 ± 10   | 4225.2 ± 9.4 | 1726.7 ± 7.8 |

Results (displayed as mean values ±SD, n = 3), SM – storage modulus, LM – loss modulus.

**Supplementary Table S4.** Standard deviation of storage ( $G'$ ) and loss ( $G''$ ) shear moduli for 90% wheat flour and 10% soy flour with  $LP + LC$  co-cultures.

| [rad/s]      | SM.0         | LM.0         | SM.4          | LM.4         | SM.10         | LM.10        | SM.24         | LM.24         |
|--------------|--------------|--------------|---------------|--------------|---------------|--------------|---------------|---------------|
| <b>0.943</b> | 1695 ± 1.8   | 691.2 ± 6.4  | 1522.6 ± 8.9  | 665.24 ± 2.9 | 2734 ± 7.2    | 891.39 ± 5.6 | 1853.9 ± 11   | 725.28 ± 7.7  |
| <b>1.73</b>  | 1837.8 ± 7.4 | 707.1 ± 3.4  | 1661.9 ± 2.2  | 679.64 ± 5   | 2946.8 ± 7.7  | 931.88 ± 4.7 | 2046.8 ± 8.4  | 754.62 ± 8.4  |
| <b>2.13</b>  | 1876.2 ± 13  | 715.4 ± 4.7  | 1705.1 ± 3.8  | 692.37 ± 3.5 | 3021.3 ± 13.1 | 941.34 ± 1.4 | 2106.3 ± 7.6  | 763.94 ± 10.6 |
| <b>3.91</b>  | 2001.4 ± 2.6 | 758.6 ± 5.6  | 1834.6 ± 10.8 | 722.6 ± 8.8  | 3256.4 ± 10.7 | 1006.8 ± 5.4 | 2268.4 ± 2.8  | 817.31 ± 3.1  |
| <b>7.19</b>  | 2141 ± 5.9   | 815.77 ± 11  | 1977.1 ± 7.1  | 763.36 ± 5.4 | 3458.1 ± 4.1  | 1103.7 ± 8.4 | 2432.8 ± 5.3  | 888.97 ± 13.5 |
| <b>13.2</b>  | 2321.3 ± 6.9 | 899.93 ± 7.9 | 2129 ± 4.9    | 843.83 ± 7.4 | 3763.1 ± 7.2  | 1224.2 ± 7.1 | 2639.4 ± 5.9  | 980.64 ± 5.6  |
| <b>24.3</b>  | 2495.7 ± 4.6 | 1000 ± 8.9   | 2286.1 ± 3.5  | 916.4 ± 4.8  | 4052 ± 7.9    | 1357.4 ± 9.4 | 2853 ± 14.1   | 1093.1 ± 6.7  |
| <b>54.8</b>  | 2670.2 ± 5.9 | 1118.5 ± 6.4 | 2473.4 ± 4.4  | 1012 ± 8.5   | 4377.9 ± 3.1  | 1534.5 ± 5.7 | 3090.1 ± 6.8  | 1226.7 ± 8.7  |
| <b>67.2</b>  | 2707.9 ± 9.2 | 1176.6 ± 5.4 | 2511.4 ± 9.3  | 1057.2 ± 4.4 | 4490.9 ± 9.8  | 1598 ± 3.7   | 3167.7 ± 6.5  | 1280.5 ± 3.9  |
| <b>82.3</b>  | 2778.5 ± 4.7 | 1230.4 ± 3.1 | 2590.7 ± 6.8  | 1109.2 ± 3.1 | 4585.5 ± 15   | 1679.9 ± 8.1 | 3244.4 ± 5.3  | 1348.7 ± 4.5  |
| <b>101</b>   | 2859.2 ± 3   | 1282.1 ± 9.8 | 2706.9 ± 6    | 1153.2 ± 8.4 | 4705.4 ± 9.7  | 1764.4 ± 5.9 | 3369.3 ± 1.5  | 1411.7 ± 6.1  |
| <b>124</b>   | 2919 ± 12.4  | 1343.2 ± 6.1 | 2815.8 ± 5.1  | 1209.3 ± 2.4 | 4824.8 ± 6.4  | 1849.9 ± 4.9 | 3486.5 ± 4.3  | 1480.3 ± 7.4  |
| <b>151</b>   | 2959.8 ± 5.6 | 1407 ± 5.3   | 2936.3 ± 9.3  | 1268.6 ± 5.6 | 4938.7 ± 4.1  | 1943.4 ± 3.7 | 3593.3 ± 4.8  | 1554.4 ± 8.9  |
| <b>186</b>   | 2961.5 ± 7.1 | 1473.9 ± 6.1 | 3063.8 ± 6.9  | 1318.8 ± 3.8 | 4998.3 ± 7.8  | 2043.3 ± 5.3 | 3717.4 ± 8.4  | 1635.4 ± 10.6 |
| <b>227</b>   | 2953 ± 10.5  | 1546.2 ± 7.2 | 3229.7 ± 1.4  | 1383 ± 5.6   | 5014.9 ± 3.3  | 2148.5 ± 9.1 | 3846.5 ± 8.9  | 1724.4 ± 5.9  |
| <b>279</b>   | 2900.8 ± 9.8 | 1612.3 ± 8   | 3450.4 ± 14   | 1448.2 ± 1.8 | 5010.6 ± 1.6  | 2260.5 ± 8.8 | 4006.8 ± 13.2 | 1813.9 ± 9.7  |
| <b>341</b>   | 2772.1 ± 4.8 | 1709.2 ± 3.6 | 3734.7 ± 101  | 1520.9 ± 2.2 | 4929 ± 3.6    | 2372 ± 5.3   | 4174.8 ± 8.9  | 1914.4 ± 8.4  |
| <b>418</b>   | 2490.3 ± 7.4 | 1761.2 ± 8.6 | 4094.9 ± 3.7  | 1581.2 ± 6.1 | 4722.3 ± 11.2 | 2482.3 ± 3.7 | 4374.3 ± 9.6  | 2006.9 ± 4.6  |
| <b>513</b>   | 1953.6 ± 7.9 | 1826.9 ± 3.5 | 4538.6 ± 2.1  | 1661.2 ± 5.9 | 4293.4 ± 6.6  | 2586 ± 4.7   | 4532.2 ± 5.7  | 2113.5 ± 3.2  |
| <b>628</b>   | 1418.6 ± 8.8 | 1873.7 ± 3.1 | 5362.5 ± 5.5  | 1814.6 ± 6.7 | 3707.2 ± 11   | 2818.3 ± 9.7 | 4936.2 ± 8.7  | 2338.4 ± 2.4  |

Results (displayed as mean values ±SD, n = 3), SM – storage modulus, LM – loss modulus.
